# Supplementary material for: Design and synthesis of water soluble (metallo)porphyrins with pendant arms: studies of binding to xanthine oxidase
Source: Royal Society of Chemistry journal article supplement (doi:10.1039/b9nj00736a), 2010-01-01
Supplement: b9nj00736a.pdf [file b9nj00736a.pdf]

## Design and synthesis of water soluble (metallo)porphyrins with pendant arms: studies of binding to xanthine oxidase

Elizabeth A. Gibson, Anne-K. Duhme-Klair and Robin N. Perutz

### Electronic Supplementary Information

**Figure S1.** Capped-stick representation of the higher order solid state structure of **2**.

**Table S1.** Torsion angles [ $^{\circ}$ ] for **2**.

**Figure S2.** Difference spectra recorded at different times throughout a typical xanthine oxidase bioassay.

**Figure S3.** Plot of change in absorption at 295 nm against time throughout a typical xanthine oxidase bioassay.

**Figure S4.** Plot of % inhibition vs.  $\log [I]$  ( $[I]$  in  $\mu\text{M}$ ) where  $I = [\mathbf{8}][\text{Cl}]_3$ .

**Figure S5.** Example plot of  $1/\nu$  against  $1/[S]$  used to determine  $K_m$ .  $[S]$  in  $\mu\text{M}$ .

**Table S1.** Assignment of  $^1\text{H}$  NMR chemical shifts for free base *meso*-5-10,15,-tris(4-pyridyl)-20-(4-acetamidophenyl) porphyrin in  $\text{CDCl}_3$ .

**Table S3.** Assignment of  $^{13}\text{C}$  NMR chemical shifts for free base *meso*-5-10,15,-tris(4-pyridyl)-20-(4-acetamidophenyl) porphyrin in  $\text{CDCl}_3$ .

**Table S4.** Assignment of  $^1\text{H}$  NMR chemical shifts for **3** in  $\text{CDCl}_3$ .

**Table S5.** Assignment of  $^{13}\text{C}$  NMR chemical shifts for **3** in  $\text{CDCl}_3$ .

**Table S6.** Assignment of  $^1\text{H}$  NMR chemical shifts for **4** in  $d_6$ -DMSO.

**Table S7.** Assignment of  $^{13}\text{C}$  NMR chemical shifts for **4** in  $d_6$ -DMSO.

**Table S8.** Assignment of  $^1\text{H}$  NMR chemical shifts for  $[\mathbf{5}][\text{Cl}]_3$  in  $d_6$ -DMSO.

**Table S9.** Assignment of  $^{13}\text{C}$  NMR chemical shifts for  $[\mathbf{5}][\text{Cl}]_3$  in  $d_6$ -DMSO.

**Table S10.** Assignment of  $^1\text{H}$  NMR chemical shifts for  $[\mathbf{6}][\text{Cl}]_3$  in  $d_6$ -DMSO.

**Table S11.** Assignment of  $^1\text{H}$  NMR chemical shifts for  $[\mathbf{7}][\text{Cl}]_3$  in  $d_6$ -DMSO.

**Table S12.** Assignment of  $^1\text{H}$  NMR chemical shifts for  $[\mathbf{8}][\text{Cl}]_3$  in  $d_6$ -DMSO.

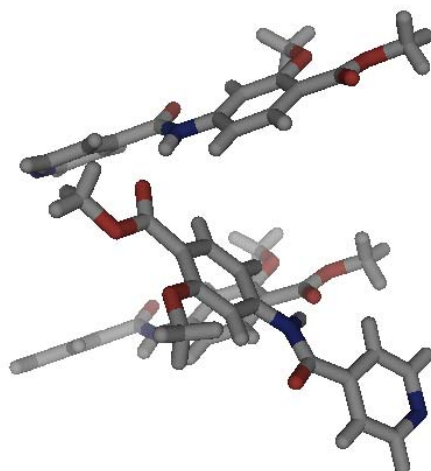

**Figure S1.** Capped-stick representation of the higher order solid state structure of **2**, colours correspond to atom types: carbon: grey; hydrogen: white; nitrogen: blue; oxygen: red.

**Table S1.** Torsion angles [°] for **2**.

---

|                       |             |
|-----------------------|-------------|
| O(2)-C(1)-C(2)-C(7)   | -12.45(15)  |
| O(1)-C(1)-C(2)-C(7)   | 166.31(9)   |
| O(2)-C(1)-C(2)-C(3)   | 166.15(11)  |
| O(1)-C(1)-C(2)-C(3)   | -15.09(15)  |
| C(1)-C(2)-C(3)-O(3)   | 2.03(15)    |
| O(4)-C(8)-C(9)-C(10)  | 24.21(15)   |
| N(1)-C(8)-C(9)-C(10)  | -155.31(10) |
| O(4)-C(8)-C(9)-C(13)  | -153.76(11) |
| N(1)-C(8)-C(9)-C(13)  | 26.72(15)   |
| N(2)-C(12)-C(13)-C(9) | 0.36(17)    |
| O(4)-C(8)-N(1)-C(5)   | 4.27(17)    |
| C(9)-C(8)-N(1)-C(5)   | -176.23(9)  |
| C(4)-C(5)-N(1)-C(8)   | 2.93(17)    |
| C(6)-C(5)-N(1)-C(8)   | -178.71(10) |
| O(2)-C(1)-O(1)-C(14)  | -3.14(15)   |
| C(2)-C(1)-O(1)-C(14)  | 178.07(9)   |
| C(4)-C(3)-O(3)-C(15)  | -2.42(15)   |
| C(2)-C(3)-O(3)-C(15)  | 177.92(9)   |

---

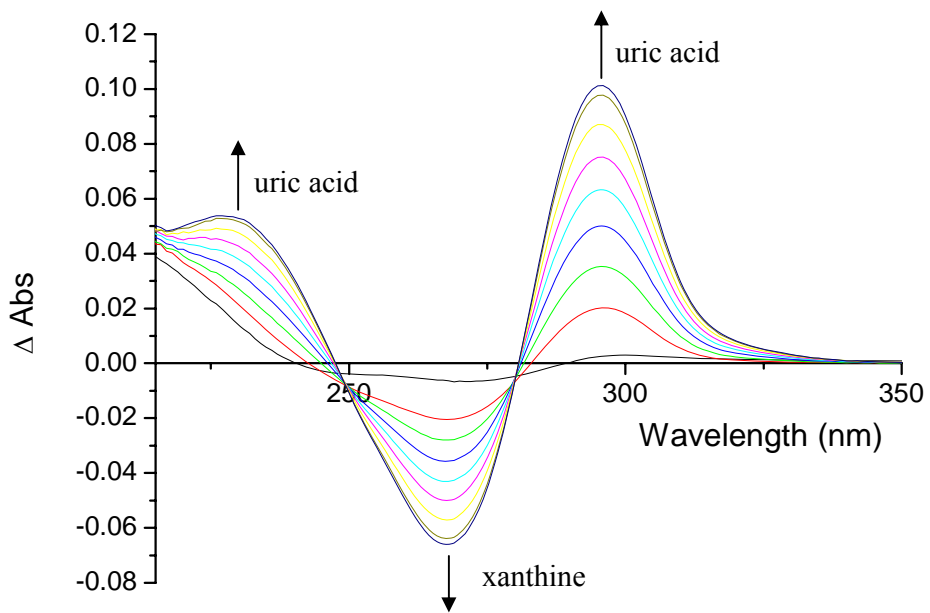

**Figure S2.** Difference spectra recorded at different times throughout a typical xanthine oxidase bioassay.

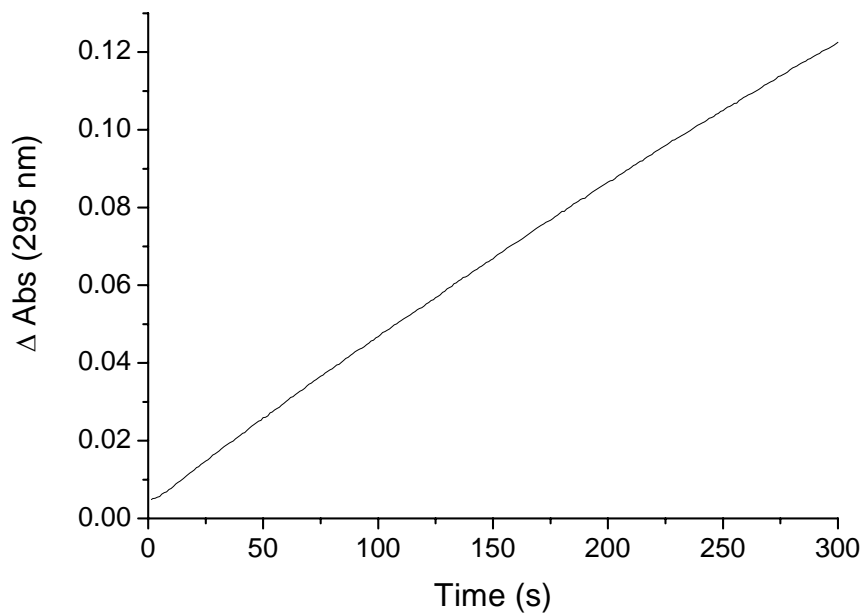

**Figure S3.** Plot of change in absorption at 295 nm against time.

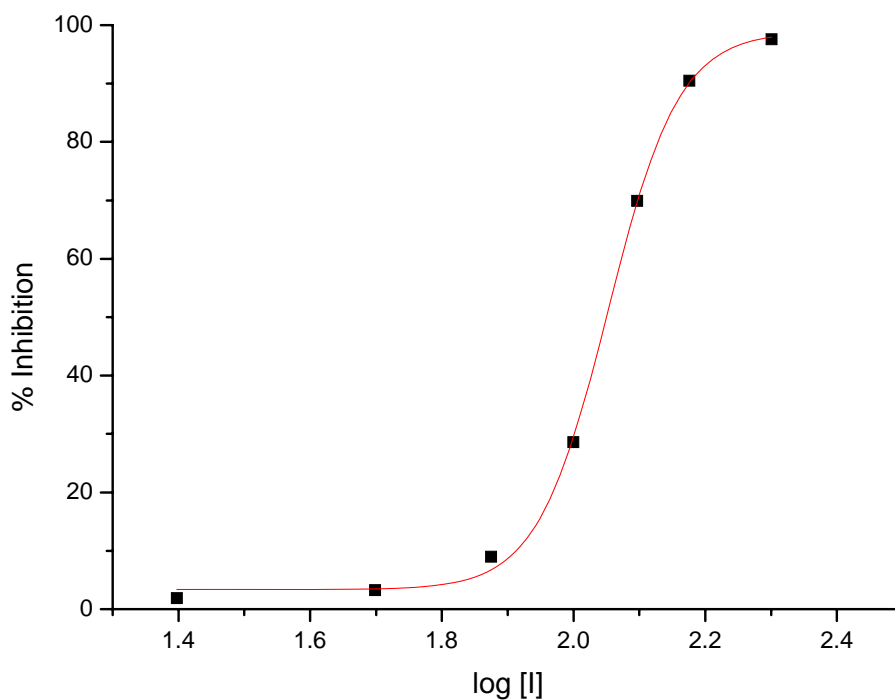

**Figure S4.** Plot of % inhibition vs. log [I] ([I] in  $\mu\text{M}$ ) where  $I = [\mathbf{8}][\text{Cl}]_3$ .  $\text{IC}_{50} = 113 \pm 1 \mu\text{M}$ .  $\chi^2 = 2.66$ ,  $R^2 = 0.999$ .

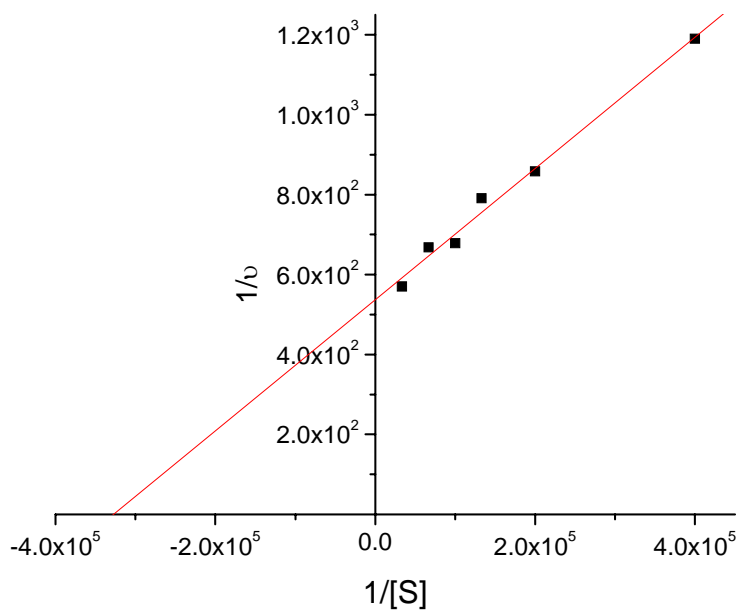

**Figure S5.** Example plot of  $1/v$  against  $1/[\text{S}]$  used to determine  $K_m$ . [S] in  $\mu\text{M}$ .  $1/V_{\text{max}} = 537$ ,  $K_m/V_{\text{max}} = 0.00164$ ,  $K_m = 3.05 \mu\text{M}$ .

## NMR tables

### Free base *meso*-5-10,15,-tris(4-pyridyl)-20-(4-acetamidophenyl) porphyrin.

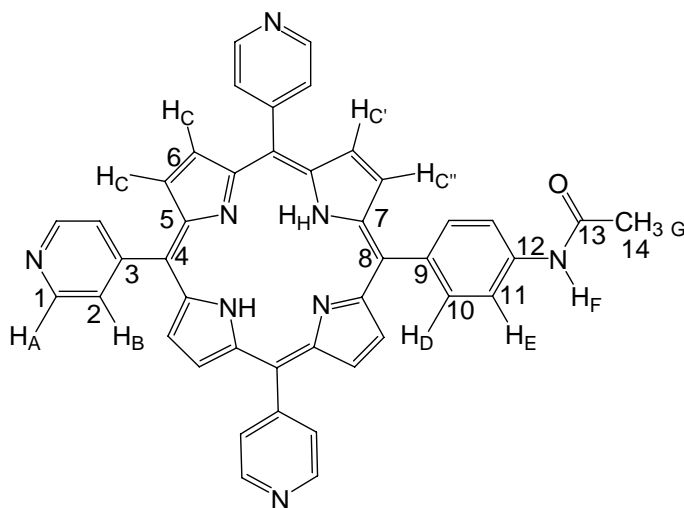

Free base *meso*-5-10,15,-tris(4-pyridyl)-20-(4-acetamidophenyl) porphyrin with atom labels: letters assigned to protons and numbers assigned to carbons.

| Label       | $\delta$ | Integration | Multiplicity | Type            | COSY to $^1\text{H}$ at $\delta$ | Lit <sup>1</sup> |
|-------------|----------|-------------|--------------|-----------------|----------------------------------|------------------|
| <b>A</b>    | 9.05     | 6           | m            | CH $\times$ 6   | 8.14                             | 9.05             |
| <b>B, D</b> | 8.14     | 8           | m            | CH $\times$ 8   | 7.94, 9.05                       | 8.10,<br>8.00    |
| <b>C</b>    | 8.84     | 4           | s            | CH $\times$ 8   | none                             | 8.85             |
|             | 8.94     | 2           | d            | CH $\times$ 2   | 8.81                             | 9.05             |
|             | 8.81     | 2           | d            | CH $\times$ 2   | 8.94                             |                  |
| <b>E</b>    | 7.94     | 2           | d            | CH $\times$ 2   | 8.14                             | 7.10             |
| <b>F</b>    | 7.74     | 1           | s            | NH              | none                             | none             |
| <b>G</b>    | 2.38     | 3           | s            | CH <sub>3</sub> | none                             | 1.95             |
| <b>H</b>    | -2.89    | 2           | s            | NH $\times$ 2   | none                             | -2.95            |

**Table S2.** Assignment of  $^1\text{H}$  NMR chemical shifts for free base *meso*-5-10,15,-tris(4-pyridyl)-20-(4-acetamidophenyl) porphyrin in  $\text{CDCl}_3$ .

<sup>1</sup> H. Li, O. S. Fedorova, A. N. Grachev, W. R. Trumble, G. A. Bohach and L. Czuchajowski, *Biochim. Biophys. Acta*, 1997, **1354**, 252.

| Label | $\delta$ | Type            | HMQC to $^1\text{H}$ at $\delta$ | HMBC to $^1\text{H}$ at $\delta$ |
|-------|----------|-----------------|----------------------------------|----------------------------------|
| 1     | 148.5    | CH              | 9.05                             | 8.14                             |
| 2     | 129.4    | CH              | 8.14                             | 9.05                             |
| 3     | 117.5    | Q               | none                             | 8.14                             |
| 4     | 117.1    | Q               | none                             | 8.14                             |
| 5     | 150.1    | Q               | none                             | 9.05                             |
| 7     | 150.0    | Q               | none                             | 9.05                             |
| 8     | 138.1    | Q               | none                             | 8.14                             |
| 9     | 121.2    | Q               | none                             | 8.14                             |
| 10    | 135.2    | CH              | 8.14                             | 8.14                             |
| 11    | 118.2    | CH              | 7.94                             | 7.74                             |
| 12    | 137.4    | Q               | none                             | 7.94                             |
| 13    | 168.8    | Q               | none                             | 2.38                             |
| 14    | 24.9     | CH <sub>3</sub> | 2.38                             | none                             |

**Table S3** Assignment of  $^{13}\text{C}$  NMR chemical shifts for free base *meso*-5-10,15,-tris(4-pyridyl)-20-(4-acetamidophenyl) porphyrin in  $\text{CDCl}_3$ .

**Free base 5,10,15-tris(4-pyridyl)-20-[4-[(2-methoxy-4-nitro-phenyl carbonyl)-amino] phenyl] porphyrin, 3.**

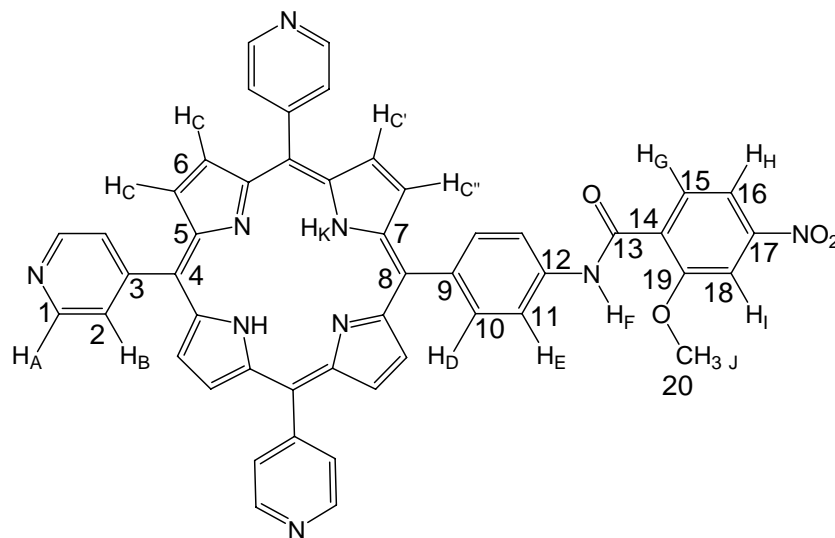

**3** with atom labels: letters assigned to protons and numbers assigned to carbons.

| Label    | $\delta$ | Integration | Multiplicity | Type            | COSY to $^1\text{H}$ at $\delta$ | <b>10</b> |
|----------|----------|-------------|--------------|-----------------|----------------------------------|-----------|
| <b>A</b> | 9.05     | 6           | d            | CH $\times$ 6   | 8.17                             | 7.78      |
| <b>B</b> | 8.17     | 6           | d            | CH $\times$ 6   | 9.05                             | 8.26      |
| <b>C</b> | 8.85     | 6           | m            | CH $\times$ 6   | 8.97                             | 8.89      |
|          | 8.97     | 2           | d            | CH $\times$ 2   | 8.85                             |           |
| <b>D</b> | 8.23     | 2           | d            | CH $\times$ 2   | 8.11                             | 8.29      |
| <b>E</b> | 8.11     | 2           | d            | CH $\times$ 2   | 8.23                             | 8.11      |
| <b>F</b> | 10.02    | 1           | s            | NH              | none                             | 9.99      |
| <b>G</b> | 8.58     | 1           | d            | CH              | 8.04                             | 8.58      |
| <b>H</b> | 8.04     | 1           | dd           | CH              | 7.98, 8.58                       | 8.05      |
| <b>I</b> | 7.98     | 1           | d            | CH              | 8.04                             | 7.96      |
| <b>J</b> | 4.29     | 3           | s            | CH <sub>3</sub> | none                             | 4.31      |
| <b>K</b> | -2.88    | 2           | s            | NH $\times$ 2   | none                             | -2.74     |

**Table S4** Assignment of  $^1\text{H}$  NMR chemical shifts for **3** in CDCl<sub>3</sub>.

| Label     | $\delta$ | Type | HMQC to $^1\text{H}$ at $\delta$ | HMBC to $^1\text{H}$ at $\delta$ |
|-----------|----------|------|----------------------------------|----------------------------------|
| <b>1</b>  | 148.3    | CH   | 9.05                             | 8.17                             |
| <b>2</b>  | 129.4    | CH   | 8.17                             | 9.05                             |
| <b>3</b>  | 117.5    | Q    | none                             | 8.17                             |
| <b>4</b>  | 117.1    | Q    | none                             | none                             |
| <b>5</b>  | 150.2    | Q    | none                             | none                             |
| <b>7</b>  | 150.1    | Q    | none                             | none                             |
| <b>8</b>  | 138.0    | Q    | none                             | none                             |
| <b>9</b>  | 121.1    | Q    | none                             | 8.23                             |
| <b>10</b> | 135.3    | CH   | 8.23                             | none                             |
| <b>11</b> | 119.1    | CH   | 8.11                             | 4.29                             |
| <b>12</b> | 137.9    | Q    | none                             | 8.23, 8.11                       |
| <b>13</b> | 161.6    | Q    | none                             | 8.58                             |
| <b>14</b> | 150.8    | Q    | none                             | 8.58, 7.98                       |

|           |       |                 |      |                  |
|-----------|-------|-----------------|------|------------------|
| <b>15</b> | 134.0 | CH              | 8.58 | none             |
| <b>16</b> | 116.6 | CH              | 8.04 | 7.98             |
| <b>17</b> | 127.3 | Q               | none | 8.04, 7.98       |
| <b>18</b> | 107.1 | CH              | 7.98 | none             |
| <b>19</b> | 157.4 | Q               | none | 4.29, 8.58, 7.98 |
| <b>20</b> | 57.3  | CH <sub>3</sub> | 4.29 | none             |

**Table S5** Assignment of <sup>13</sup>C NMR chemical shifts for **3** in CDCl<sub>3</sub>.

**Free base 5,10,15-tris(*N*-methyl-4-pyridiniumyl)-20-[4-[(2-methoxy-4-nitrophenyl)carbonyl]-amino] phenyl] porphyrin tris iodide, **4**.**

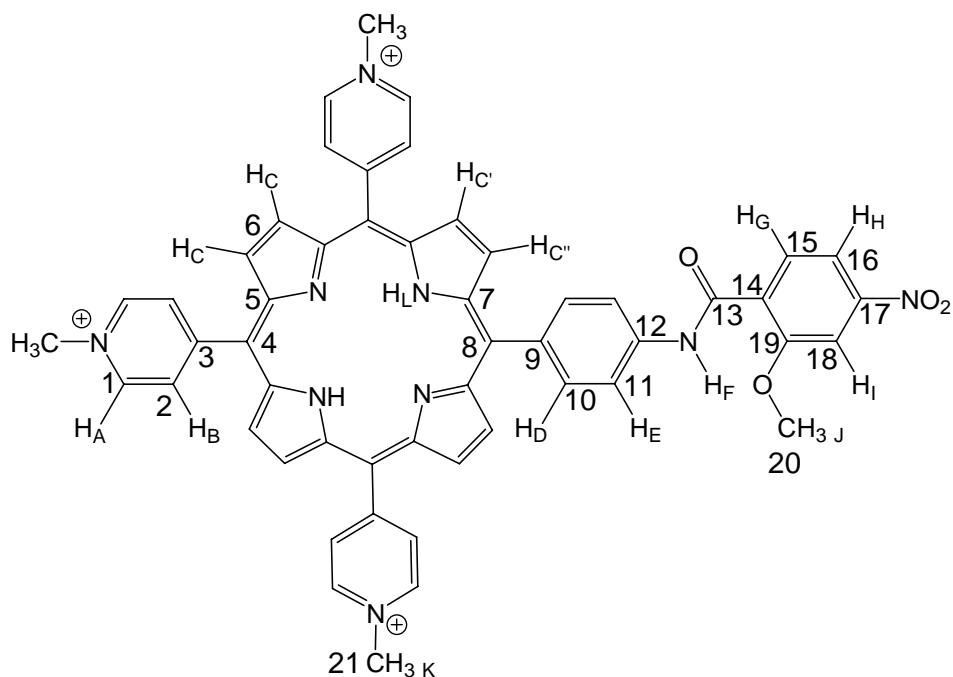

**4** with atom labels: letters assigned to protons and numbers assigned to carbons.

| Label       | $\delta$     | Integration | Multiplicity | Type   | COSY to <sup>1</sup> H at $\delta$ |
|-------------|--------------|-------------|--------------|--------|------------------------------------|
| <b>A</b>    | 9.49         | 6           | d            | CH × 6 | 4.73, 9.01                         |
| <b>B</b>    | 9.01         | 6           | m            | CH × 8 | 9.49                               |
| <b>C</b>    | 9.18<br>9.10 | 8           | m            | CH × 8 | none                               |
| <b>D, E</b> | 8.25         | 4           | m            | CH × 4 | none                               |



|          |       |   |   |                     |      |
|----------|-------|---|---|---------------------|------|
| <b>F</b> | 10.92 | 1 | s | NH                  | none |
| <b>G</b> | 7.94  | 1 | m | CH                  | none |
| <b>H</b> | 8.03  | 1 | m | CH                  | 7.94 |
| <b>I</b> | 8.03  | 1 | s | CH                  | 8.03 |
| <b>J</b> | 4.12  | 3 | s | CH <sub>3</sub>     | none |
| <b>K</b> | 4.73  | 9 | s | CH <sub>3</sub> × 3 | 9.49 |
| <b>L</b> | -2.98 | 2 | s | NH × 2              | none |

**Table S6** Assignment of <sup>1</sup>H NMR chemical shifts for **4** in d<sub>6</sub>-DMSO.

| <b>Label</b> | <b>δ</b> | <b>Type</b>     | <b>HMQC to <sup>1</sup>H at δ</b> | <b>HMBC to <sup>1</sup>H at δ</b> |
|--------------|----------|-----------------|-----------------------------------|-----------------------------------|
| <b>1</b>     | 144.7    | CH              | 9.49                              | 4.73, 9.49, 9.01                  |
| <b>2</b>     | 132.6    | CH              | 9.01                              | 9.49, 9.18, 9.01                  |
| <b>3</b>     | 115.8    | Q               | none                              | 9.01                              |
| <b>4</b>     | 115.0    | Q               | none                              | none                              |
| <b>5</b>     | 157.1    | Q               | none                              | none                              |
| <b>7</b>     | 157.0    | Q               | none                              | 9.49                              |
| <b>8</b>     | 139.7    | Q               | none                              | 8.25                              |
| <b>9</b>     | 123.2    | Q               | none                              | none                              |
| <b>10</b>    | 135.4    | CH              | 8.25                              | none                              |
| <b>11</b>    | 118.7    | CH              | 8.25                              | 10.92                             |
| <b>12</b>    | 136.2    | Q               | none                              | 8.25                              |
| <b>13</b>    | 164.5    | Q               | none                              | 10.92                             |
| <b>14</b>    | 150.0    | Q               | none                              | 8.03                              |
| <b>15</b>    | 130.6    | CH              | 7.94                              | none                              |
| <b>16</b>    | 116.2    | CH              | 8.03                              | none                              |
| <b>17</b>    | 127.6    | Q               | none                              | none                              |
| <b>18</b>    | 107.5    | CH              | 8.03                              | none                              |
| <b>19</b>    | 157.4    | Q               | none                              | 4.12, 8.04, 7.94                  |
| <b>20</b>    | 57.3     | CH <sub>3</sub> | 4.12                              | none                              |
| <b>21</b>    | 48.5     | CH <sub>3</sub> | 4.73                              | 9.49                              |

**Table S7** Assignment of  $^{13}\text{C}$  NMR chemical shifts for **4** in  $d_6$ -DMSO.

**Free base 5,10,15-tris(*N*-methyl-4-pyridiniumyl)-20-[4-[(2-methoxy-4-amino-phenylcarbonyl)-amino] phenyl] porphyrin, **5**.**

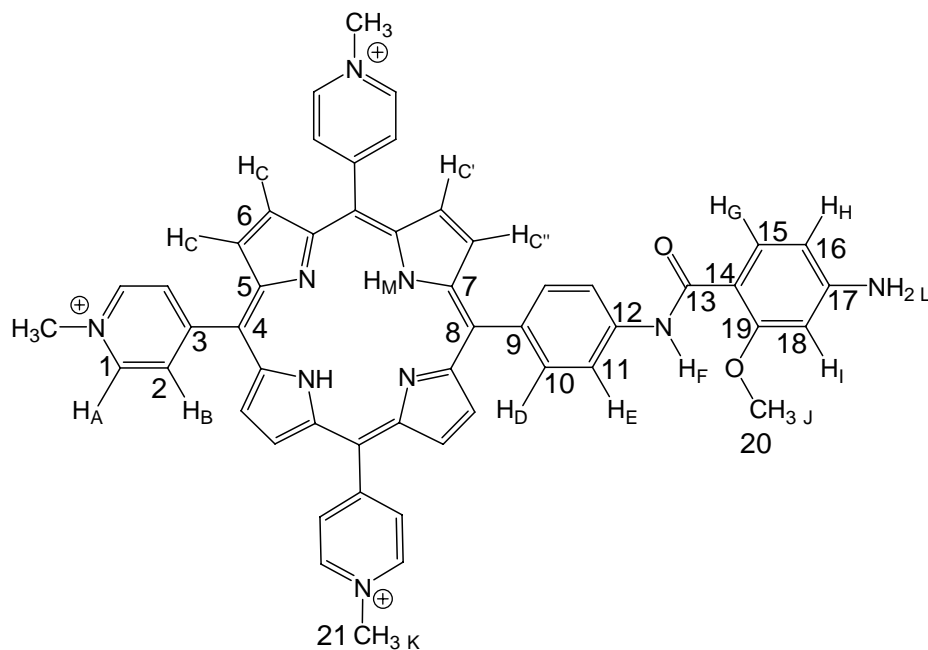

**5** with atom labels: letters assigned to protons and numbers assigned to carbons.

| Label    | $\delta$ | Integration | Multiplicity | Type                   | COSY to $^1\text{H}$ at $\delta$ |
|----------|----------|-------------|--------------|------------------------|----------------------------------|
| <b>A</b> | 9.53     | 6           | m            | $\text{CH} \times 6$   | 4.73, 9.00                       |
| <b>B</b> | 9.00     | 6           | m            | $\text{CH} \times 6$   | 9.53                             |
| <b>C</b> | 9.13     | 8           | m            | $\text{CH} \times 8$   | none                             |
| <b>D</b> | 8.21     | 2           | d            | $\text{CH} \times 2$   | 8.19                             |
| <b>E</b> | 8.19     | 2           | d            | $\text{CH} \times 2$   | 8.21                             |
| <b>F</b> | 10.21    | 1           | s            | NH                     | none                             |
| <b>G</b> | 7.74     | 1           | d            | CH                     | 6.33                             |
| <b>H</b> | 6.33     | 1           | dd           | CH                     | 7.74, 6.40                       |
| <b>I</b> | 6.40     | 1           | d            | CH                     | 6.33                             |
| <b>J</b> | 4.01     | 3           | s            | $\text{CH}_3$          | none                             |
| <b>K</b> | 4.73     | 9           | s            | $\text{CH}_3 \times 3$ | 9.53                             |
| <b>L</b> | 5.97     | 2           | br s         | $\text{NH}_2$          | none                             |

|          |       |   |   |        |      |
|----------|-------|---|---|--------|------|
| <b>M</b> | -2.99 | 2 | s | NH × 2 | none |
|----------|-------|---|---|--------|------|

**Table S8** Assignment of  $^1\text{H}$  NMR chemical shifts for  $[\mathbf{5}][\text{Cl}]_3$  in  $d_6$ -DMSO.

| <b>Label</b> | <b><math>\delta</math></b> | <b>Type</b>     | <b>HMQC to <math>^1\text{H}</math> at <math>\delta</math></b> | <b>HMBC to <math>^1\text{H}</math> at <math>\delta</math></b> |
|--------------|----------------------------|-----------------|---------------------------------------------------------------|---------------------------------------------------------------|
| <b>1</b>     | 144.7                      | CH              | 9.53                                                          | 4.73, 9, 9.53                                                 |
| <b>2</b>     | 132.6                      | CH              | 9.00                                                          | 9.53                                                          |
| <b>3</b>     | 115.8                      | Q               | none                                                          | none                                                          |
| <b>4</b>     | 114.9                      | Q               | none                                                          | none                                                          |
| <b>5</b>     | 157.1                      | Q               | none                                                          | none                                                          |
| <b>7</b>     | 157.0                      | Q               | none                                                          | 9.53                                                          |
| <b>8</b>     | 140.3                      | Q               | none                                                          | 8.19                                                          |
| <b>9</b>     | 123.6                      | Q               | none                                                          | none                                                          |
| <b>10</b>    | 135.4                      | CH              | 8.21                                                          | none                                                          |
| <b>11</b>    | 118.8                      | CH              | 8.24                                                          | 10.21                                                         |
| <b>12</b>    | 135.7                      | Q               | none                                                          | 8.21                                                          |
| <b>13</b>    | 164.7                      | Q               | none                                                          | none                                                          |
| <b>14</b>    | 154.6                      | Q               | none                                                          | 7.74                                                          |
| <b>15</b>    | 133.2                      | CH              | 7.74                                                          | none                                                          |
| <b>16</b>    | 107.0                      | CH              | 6.33                                                          | 6.4                                                           |
| <b>17</b>    | 109.7                      | Q               | none                                                          | 6.33, 6.4                                                     |
| <b>18</b>    | 96.6                       | CH              | 6.40                                                          | none                                                          |
| <b>19</b>    | 159.6                      | Q               | none                                                          | 4.01, 7.74                                                    |
| <b>20</b>    | 56.3                       | CH <sub>3</sub> | 4.01                                                          | none                                                          |
| <b>21</b>    | 48.3                       | CH <sub>3</sub> | 4.73                                                          | 9.53                                                          |

**Table S9** Assignment of  $^{13}\text{C}$  NMR chemical shifts for  $[\mathbf{5}][\text{Cl}]_3$  in  $d_6$ -DMSO.

**Free base 5,10,15-tris(*N*-methyl-4-pyridiniumyl)-20-[4-[(2-methoxy-4-[(pyridine-4-carbonyl)-amino]-phenylcarbonyl)-amino] phenyl]-porphyrin, 6.**

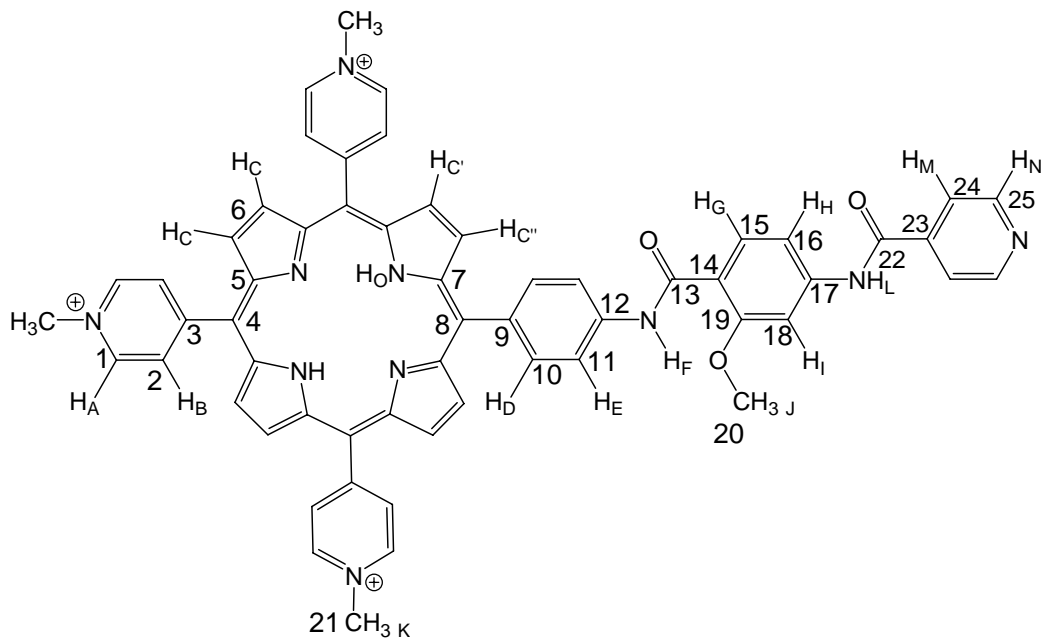

**6** with atom labels: letters assigned to protons and numbers assigned to carbons.

| Label       | $\delta$ | Integration | Multiplicity | Type                   | COSY to $^1\text{H}$ at $\delta$ |
|-------------|----------|-------------|--------------|------------------------|----------------------------------|
| <b>A</b>    | 9.55     | 6           | m            | $\text{CH} \times 6$   | 4.75,9.01                        |
| <b>B, M</b> | 9.01     | 8           | m            | $\text{CH} \times 8$   | 9.55                             |
| <b>C</b>    | 9.10     | 8           | m            | $\text{CH} \times 8$   | none                             |
| <b>D</b>    | 8.29     | 2           | d            | $\text{CH} \times 2$   | 8.23                             |
| <b>E</b>    | 8.23     | 2           | d            | $\text{CH} \times 2$   | 8.23                             |
| <b>F</b>    | 11.35    | 1           | s            | NH                     | none                             |
| <b>G</b>    | 7.87     | 1           | s            | CH                     | 7.72                             |
| <b>H</b>    | 7.72     | 1           | d            | CH                     | 7.87                             |
| <b>I</b>    | 7.95     | 1           | s            | CH                     | none                             |
| <b>J</b>    | 4.06     | 3           | s            | $\text{CH}_3$          | none                             |
| <b>K</b>    | 4.75     | 9           | s            | $\text{CH}_3 \times 3$ | 9.55                             |
| <b>L</b>    | 10.58    | 1           | s            | NH                     | none                             |
| <b>N</b>    | 8.35     | 2           | d            | CH                     | 9.01                             |

|          |       |   |   |        |      |
|----------|-------|---|---|--------|------|
| <b>O</b> | -2.95 | 2 | d | NH × 2 | none |
|----------|-------|---|---|--------|------|

**Table S10** Assignment of  $^1\text{H}$  NMR chemical shifts for [6][Cl]<sub>3</sub> in d<sub>6</sub>-DMSO.

**Zinc 5,10,15-tris(*N*-methyl-4-pyridiniumyl)-20-[4-[(2-methoxy-4-amino-phenylcarbonyl)-amino] phenyl] porphyrin, 7.**

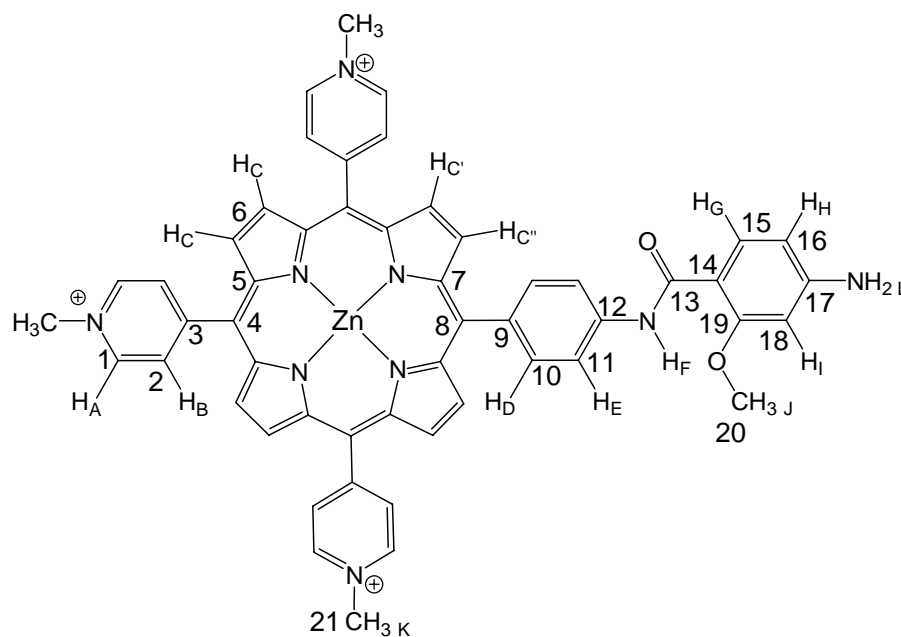

7 with atom labels: letters assigned to protons and numbers assigned to carbons.

| Label    | $\delta$ | Integration | Multiplicity | Type                | COSY to $^1\text{H}$ at $\delta$ |
|----------|----------|-------------|--------------|---------------------|----------------------------------|
| <b>A</b> | 9.41     | 6           | m            | CH × 6              | 4.70, 8.88                       |
| <b>B</b> | 8.88     | 6           | m            | CH × 6              | 8.98                             |
| <b>C</b> | 8.98     | 8           | m            | CH × 8              | none                             |
| <b>D</b> | 8.17     | 2           | d            | CH × 2              | 8.10                             |
| <b>E</b> | 8.10     | 2           | d            | CH × 2              | 8.17                             |
| <b>F</b> | 10.18    | 1           | s            | NH                  | none                             |
| <b>G</b> | 7.76     | 1           | s            | CH                  | 6.33                             |
| <b>H</b> | 6.32     | 1           | d            | CH                  | 7.76                             |
| <b>I</b> | 6.39     | 1           | s            | CH                  | none                             |
| <b>J</b> | 4.02     | 3           | s            | CH <sub>3</sub>     | none                             |
| <b>K</b> | 4.70     | 9           | s            | CH <sub>3</sub> × 3 | 8.98                             |

|          |      |   |      |                 |      |
|----------|------|---|------|-----------------|------|
| <b>L</b> | 5.95 | 2 | br s | NH <sub>2</sub> | none |
|----------|------|---|------|-----------------|------|

**Table S11** Assignment of <sup>1</sup>H NMR chemical shifts for [7][Cl]<sub>3</sub> in d<sub>6</sub>-DMSO.

**Zinc 5,10,15-tris(*N*-methyl-4-pyridiniumyl)-20-[4-{(2-methoxy-4-[(pyridine-4-carbonyl)-amino]-phenylcarbonyl)-amino} phenyl]-porphyrin, 8.**

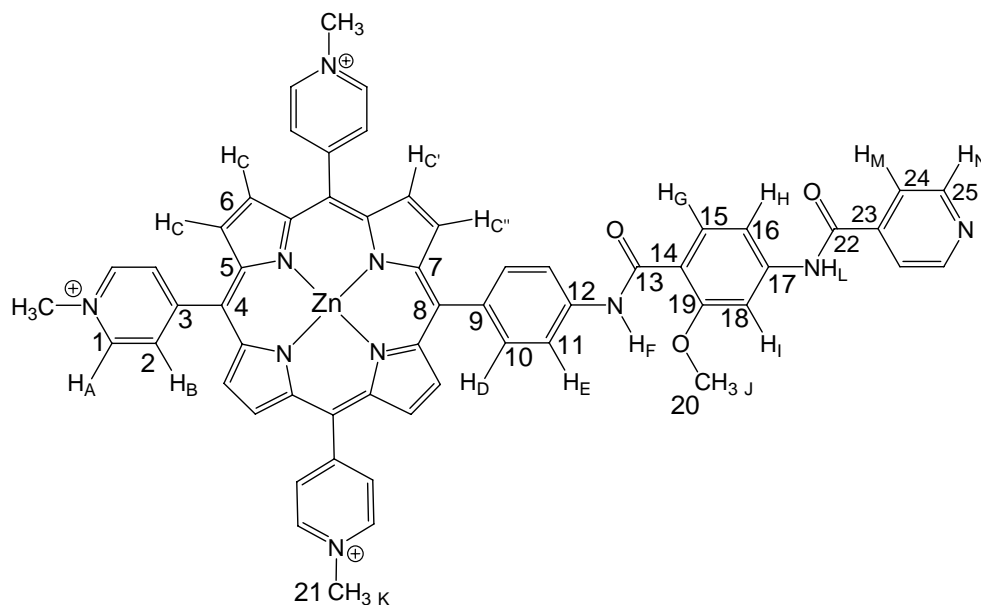

**8** with atom labels: letters assigned to protons and numbers assigned to carbons.

| <b>Label</b> | <b>δ</b> | <b>Integration</b> | <b>Multiplicity</b> | <b>Type</b>         | <b>COSY to <sup>1</sup>H at δ</b> |
|--------------|----------|--------------------|---------------------|---------------------|-----------------------------------|
| <b>A</b>     | 9.48     | 6                  | m                   | CH × 6              | 4.75,8.92                         |
| <b>B</b>     | 8.92     | 6                  | m                   | CH × 6              | 8.47                              |
| <b>C</b>     | 9.00     | 8                  | m                   | CH × 8              | none                              |
| <b>D</b>     | 8.23     | 2                  | d                   | CH × 2              | 8.14                              |
| <b>E</b>     | 8.14     | 2                  | d                   | CH × 2              | 8.23                              |
| <b>F</b>     | 11.18    | 1                  | s                   | NH                  | none                              |
| <b>G</b>     | 7.82     | 1                  | s                   | CH                  | 7.69                              |
| <b>H</b>     | 7.69     | 1                  | d                   | CH                  | 7.82                              |
| <b>I</b>     | 7.91     | 1                  | s                   | CH                  | none                              |
| <b>J</b>     | 4.05     | 3                  | s                   | CH <sub>3</sub>     | none                              |
| <b>K</b>     | 4.75     | 9                  | s                   | CH <sub>3</sub> × 3 | 9.48                              |
| <b>L</b>     | 10.98    | 1                  | s                   | NH                  | none                              |

|          |      |   |   |    |      |
|----------|------|---|---|----|------|
| <b>M</b> | 8.81 | 2 | d | CH | 7.99 |
| <b>N</b> | 7.99 | 2 | d | CH | 8.81 |

**Table S12** Assignment of  $^1\text{H}$  NMR chemical shifts for **[8][Cl]<sub>3</sub>** in  $\text{d}_6$ -DMSO.
